# Supplementary material for: Amyloid-β Tetramers and Divalent Cations at the Membrane/Water Interface: Simple Models Support a Functional Role
Source: MDPI journal article supplement (doi:10.3390/ijms241612698), 2023-08-11
Supplement: s1 [file s1]

# **Amyloid- $\beta$ tetramers and divalent cations at the membrane/water interface: Simple models support a functional role.**

Authors: Pawel Krupa <sup>1</sup>, Giovanni La Penna <sup>2,3,\*</sup> and Mai Suan Li <sup>1,4</sup>

<sup>1</sup> Institute of physics, Polish Academy of Sciences, Warsaw, Poland;

<sup>2</sup> Istituto di Chimica dei Composti Organometallici, Consiglio Nazionale delle Ricerche (CNR), Sesto Fiorentino (Firenze), Italy;

<sup>3</sup> Sezione di Roma Tor Vergata, Istituto nazionale di fisica nucleare, Via della Ricerca Scientifica 1, I-00133 Roma, Italy;

<sup>4</sup> Institute for Computational Science and Technology, Ho Chi Minh City, Vietnam.

## **Supplementary data**

- Figure S1 - Minimal distance between addressed cation and any of the atoms in DMPC measured in cMD along with time.
- Figure S2 - Radial distribution function ( $g(r)$ ) of M-OX pairs, with OX any oxygen atom in DMPC, measured in cMD.
- Figure S3 - Distribution of SASA<sub>PM</sub> and SASA<sub>P</sub> measured for models **1-3**/DMPC, in the differ-ent cMD trajectories (1-5).
- The frequency of values of  $R \geq 0.05$  is also reported for each separated trajectory (right) in Fig. 3.

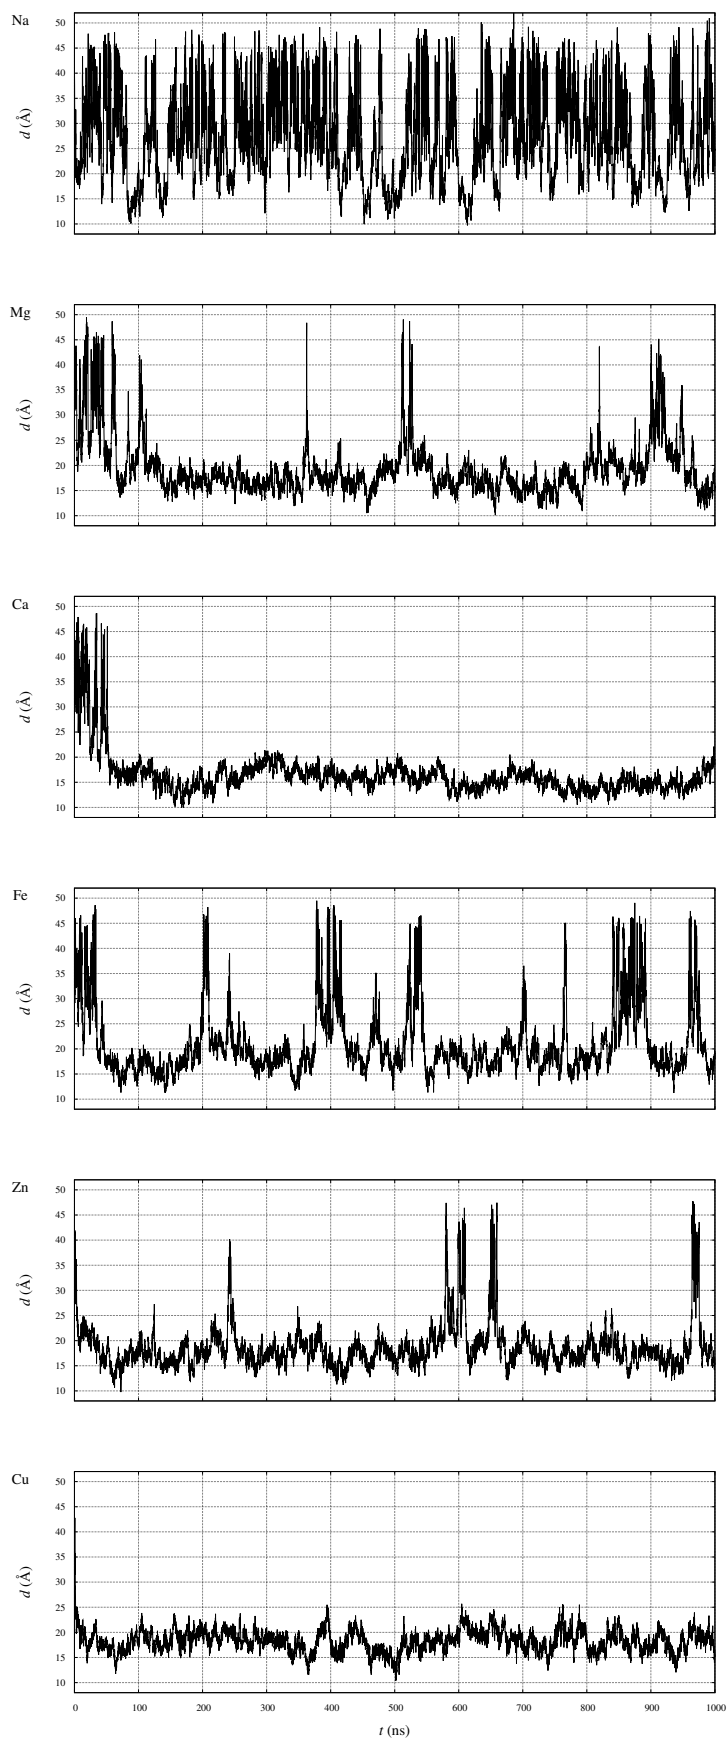

Figure S1: Minimal distance ( $d$ ) between addressed cation M and any of the atoms in DMPC as measured in cMD simulations along with time  $t$ .

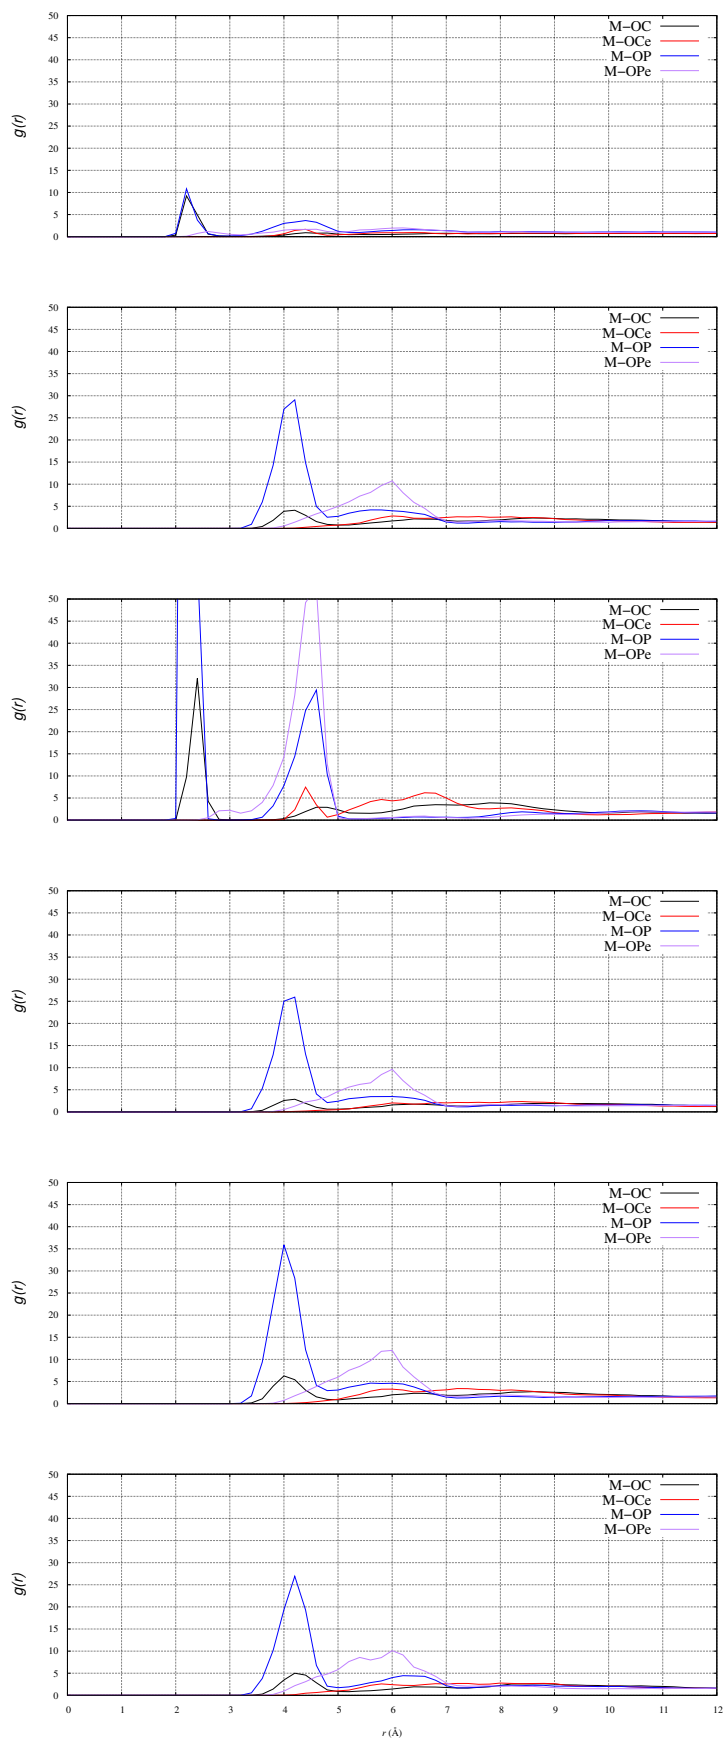

Figure S2: Radial distribution function ( $g(r)$ ) of M-OX pairs, with M the addressed cation and OX the O atoms in DMPC, measured in cMD simulations. M-OC (black); M-OCe (red); M-OP (blue); M-OPe (purple). OC is the carbonyl oxygen; OCe is the ester oxygen; OP is the terminal phosphodiester oxygen; OPe is the bridging phosphodiester oxygen.

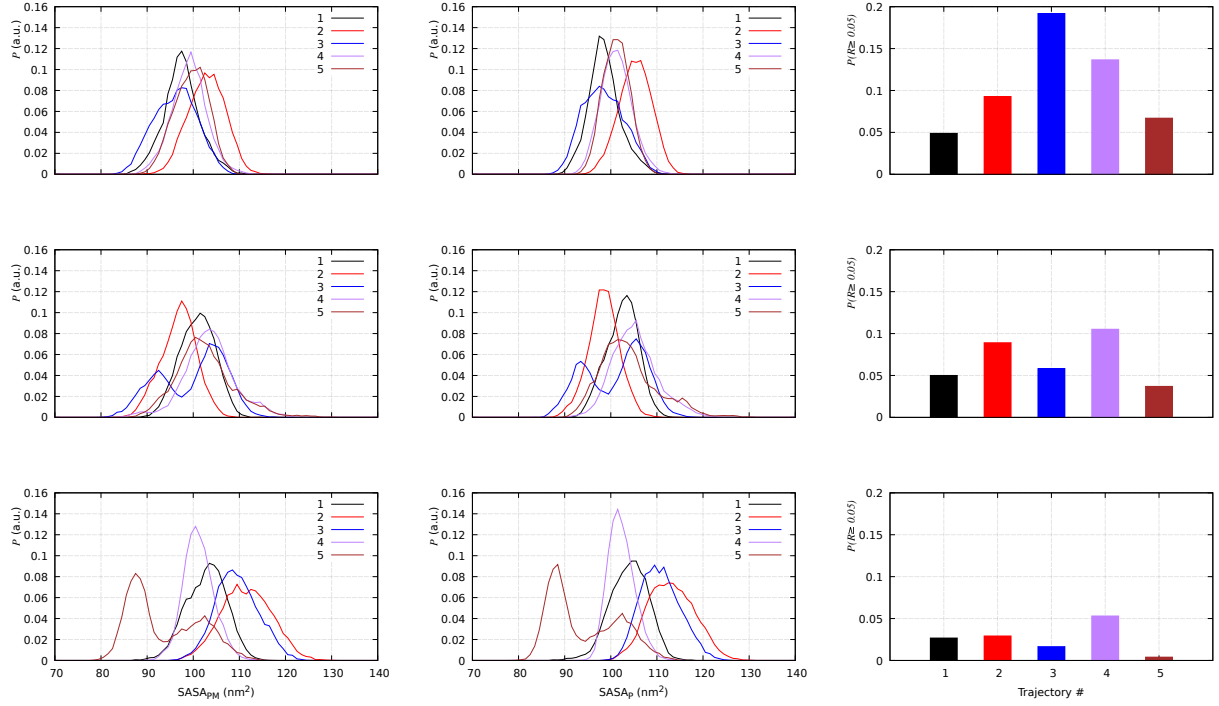

Figure S3: Distribution of SASAP<sub>M</sub> (left) and SASAP (middle) (see Methods) of A 42 tetramers in the different models exposed to DMPC. Right - Frequency of samples with  $R \geq 0.05$  for each trajectory ( $x$ -axis). The different curves (1-5) are obtained by the different independent cMD trajectories (see Table 2 in the main text). Top - model 1/DMPC; middle - 2/DMPC; bottom - 3/DMPC.
